# Supplementary material
Source: PubMed Central journal article supplement (PMC7415563)
Supplement: NIHMS1596728-supplement-1.pdf [file NIHMS1596728-supplement-1.pdf]

## An Up-to-date Overview of Computational Polypharmacology in Modern Drug Discovery

Rajan Chaudhari<sup>1</sup>, Long Wolf Fong<sup>1,2</sup>, Zhi Tan<sup>1</sup>, Beibei Huang<sup>1</sup>, Shuxing Zhang<sup>1,2,\*</sup>

**Supplementary Table 3.1: Chemical structures and physicochemical properties of repurposed drugs in clinical trials.**

| Drug Name                 | 2D Structure                                                                                                                                                                                                                                                                                                                                                                                                                                                                                                   | CID  | Weight | TPSA  | logP(o/w) | logS  |
|---------------------------|----------------------------------------------------------------------------------------------------------------------------------------------------------------------------------------------------------------------------------------------------------------------------------------------------------------------------------------------------------------------------------------------------------------------------------------------------------------------------------------------------------------|------|--------|-------|-----------|-------|
| Paracetamol/Acetaminophen | 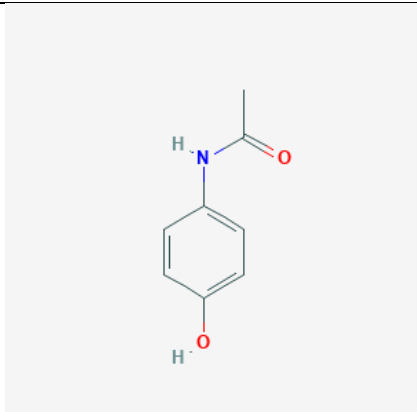 The image shows the 2D chemical structure of Paracetamol (Acetaminophen). It consists of a central benzene ring. At the top position (1-position), there is an acetamido group (-NH-C(=O)-CH3). At the bottom position (4-position), there is a hydroxyl group (-OH). The nitrogen atom in the acetamido group is blue, the carbonyl oxygen is red, and the hydroxyl oxygen is red. The hydrogen atoms are shown in black. | 1983 | 151.17 | 49.33 | 0.89      | -1.23 |

|               |                                                                                                                                                                                                                                                                                                                                                                                    |       |        |       |      |       |
|---------------|------------------------------------------------------------------------------------------------------------------------------------------------------------------------------------------------------------------------------------------------------------------------------------------------------------------------------------------------------------------------------------|-------|--------|-------|------|-------|
| Rosiglitazone | 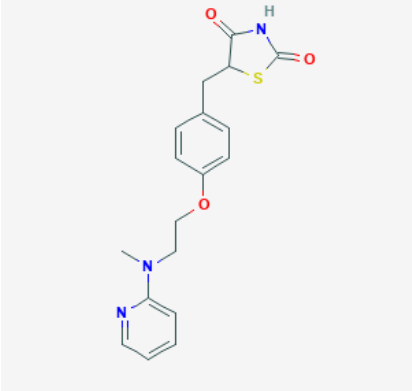 <p>The chemical structure of Rosiglitazone consists of a central benzene ring. At the top position, there is a propyl chain ending in a thiazolidine-4-carboxamide ring. At the bottom position, there is an ether linkage (-O-) connected to a 2-(2-dimethylaminoethyl)pyridin-5-yl group.</p> | 77999 | 357.43 | 71.53 | 2.62 | -4.00 |
| Niclosamide   |  <p>The chemical structure of Niclosamide is a symmetrical molecule. It features a central amide group (-NH-) connecting two 4-chlorophenyl rings. One of the phenyl rings is also substituted with a nitro group (-NO<sub>2</sub>) at the para position relative to the amide linkage.</p>     | 4477  | 327.12 | 95.15 | 3.74 | -5.25 |

|             |                                                                                                                                                                                                                                                                                                                                                                                                                                               |       |        |        |      |       |
|-------------|-----------------------------------------------------------------------------------------------------------------------------------------------------------------------------------------------------------------------------------------------------------------------------------------------------------------------------------------------------------------------------------------------------------------------------------------------|-------|--------|--------|------|-------|
| Fenofibrate | 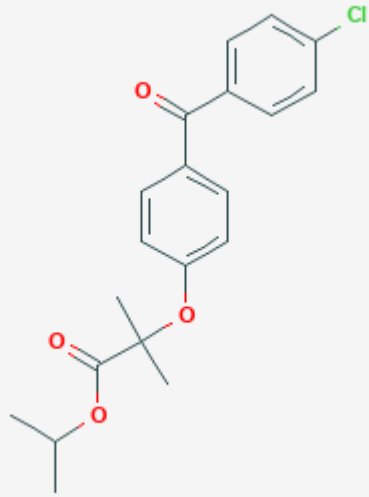 <p>The chemical structure of Fenofibrate is shown. It consists of a central benzene ring with a chlorine atom at the para position. This ring is connected via a carbonyl group to another benzene ring. This second benzene ring is linked through an oxygen atom to a tert-butyl ester group, which is further connected to an isobutyl ester group.</p> | 3339  | 360.84 | 52.60  | 5.16 | -5.96 |
| Nelfinavir  |  <p>The chemical structure of Nelfinavir is shown. It features a complex bicyclic core with a nitrogen atom. Attached to this core are a tert-butyl amide group, a hydroxyl group, and a side chain containing a sulfur atom linked to a phenyl ring, and another nitrogen atom linked to a 2-hydroxyphenyl group.</p>                                     | 64143 | 567.80 | 101.90 | 5.36 | -7.39 |

|              |                                                                                                                                                                                                                                                                                                                                                                                                                                                                                                                                                                         |          |        |        |       |       |
|--------------|-------------------------------------------------------------------------------------------------------------------------------------------------------------------------------------------------------------------------------------------------------------------------------------------------------------------------------------------------------------------------------------------------------------------------------------------------------------------------------------------------------------------------------------------------------------------------|----------|--------|--------|-------|-------|
| Azithromycin | 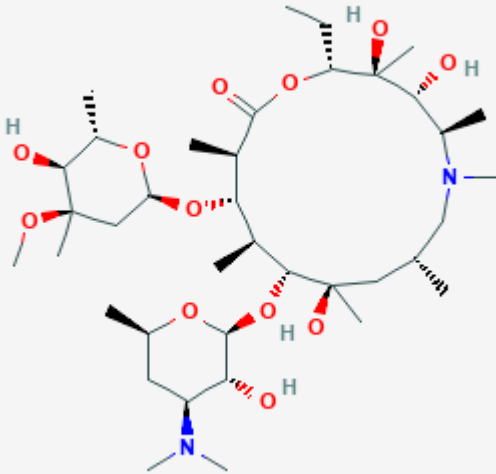 <p>The image shows the chemical structure of Azithromycin, a 15-membered macrolide antibiotic. It features a central nitrogen atom (blue) in a ring, with a methyl group (black) attached. The ring is substituted with several hydroxyl groups (red oxygen, white hydrogen) and a side chain containing a tetrahydrofuran ring and a methyl group. Stereochemistry is indicated with wedges and dashes.</p>                                                                         | 447043   | 749.00 | 180.08 | 3.43  | -3.69 |
| Tigecycline  |  <p>The image shows two chemical structures related to Tigecycline. The top structure is triethylphosphine, consisting of a central phosphorus atom (orange) bonded to three ethyl groups (black). The bottom structure is the tigecycline core, a tetracycline derivative, shown as a complex polycyclic system with multiple oxygen atoms (red) and acetyl groups (black). It is coordinated to a gold ion (Au<sup>+</sup>, yellow) and a sulfide ion (S<sup>-</sup>, yellow).</p> | 54686904 | 585.66 | 205.76 | -0.26 | -3.41 |

|            |                                                                                                                                                                                                                                                                                                                                            |        |        |        |      |       |
|------------|--------------------------------------------------------------------------------------------------------------------------------------------------------------------------------------------------------------------------------------------------------------------------------------------------------------------------------------------|--------|--------|--------|------|-------|
| Linezolid  | 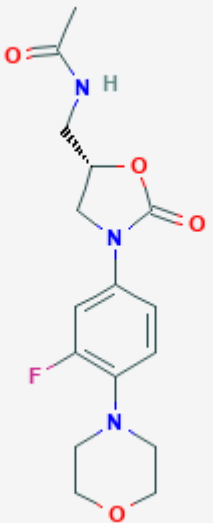 <p>The chemical structure of Linezolid consists of a morpholine ring connected to a 4-fluorophenyl ring, which is further connected to a 5-membered oxazolidinone ring. A methylamino group is attached to the oxazolidinone ring.</p>                  | 441401 | 337.35 | 71.11  | 0.37 | -2.40 |
| Pranlukast |  <p>The chemical structure of Pranlukast features a benzimidazole ring system. One of the benzimidazole nitrogens is substituted with a 4-(4-phenylbutoxy)phenylamino group. The other benzimidazole nitrogen is substituted with a carbonyl group.</p> | 4887   | 481.51 | 119.09 | 4.61 | -6.90 |

|           |                                                                                                                                                                                                                                                                                                                                                                                                                                                                                                                                                     |          |        |       |      |       |
|-----------|-----------------------------------------------------------------------------------------------------------------------------------------------------------------------------------------------------------------------------------------------------------------------------------------------------------------------------------------------------------------------------------------------------------------------------------------------------------------------------------------------------------------------------------------------------|----------|--------|-------|------|-------|
| Olaparib  | 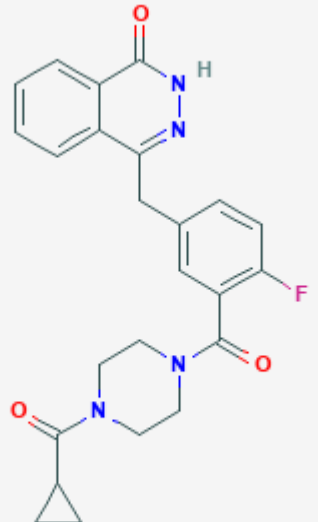 <p>The image shows the chemical structure of Olaparib. It features a benzimidazole ring system with a carbonyl group at the 2-position. A methylene group connects the 4-position of the benzimidazole to a para-substituted benzene ring. This benzene ring has a fluorine atom at the 3-position and a carbonyl group at the 1-position. The carbonyl group is attached to a piperazine ring, which is further substituted with a cyclopropylmethyl group.</p> | 23725625 | 434.47 | 82.08 | 2.53 | -4.88 |
| Salirasib |  <p>The image shows the chemical structure of Salirasib. It consists of a long, branched hydrocarbon chain with three double bonds. The chain is terminated by a sulfur atom, which is bonded to a benzene ring. The benzene ring has a carboxylic acid group (-COOH) at the 1-position and a methyl group at the 3-position.</p>                                                                                                                                | 5469318  | 358.55 | 37.30 | 4.72 | -7.24 |

|             |                                                                                                                                                                                                                                                                                                                                                                                                                                                                                                                                                                           |        |        |       |      |       |
|-------------|---------------------------------------------------------------------------------------------------------------------------------------------------------------------------------------------------------------------------------------------------------------------------------------------------------------------------------------------------------------------------------------------------------------------------------------------------------------------------------------------------------------------------------------------------------------------------|--------|--------|-------|------|-------|
| Nilotinib   | 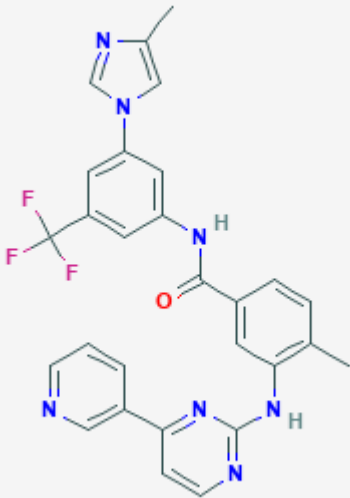 <p>The chemical structure of Nilotinib is a complex heterocyclic molecule. It features a central benzimidazole ring system. One of the benzimidazole nitrogens is substituted with a 2-methylimidazole ring. The other benzimidazole nitrogen is substituted with a 4-methylphenylamino group. The 2-position of the benzimidazole ring is substituted with a 3-(difluoromethyl)phenylamino group. The 5-position of the benzimidazole ring is substituted with a 4-pyridyl group.</p> | 644241 | 529.53 | 97.62 | 4.34 | -7.47 |
| Propranolol |  <p>The chemical structure of Propranolol is a beta-blocker. It consists of a naphthalene ring system attached to a propanolamine chain. The naphthalene ring is connected to the chain via an ether linkage (-O-). The chain includes a secondary amine group (-NH-) and a hydroxyl group (-OH).</p>                                                                                                                                                                                  | 4946   | 259.35 | 41.49 | 2.92 | -3.53 |

|             |                                                                                      |       |        |       |       |       |
|-------------|--------------------------------------------------------------------------------------|-------|--------|-------|-------|-------|
| Agomelatine | 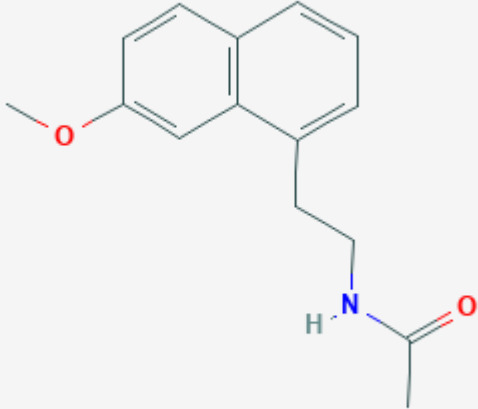   | 82148 | 243.31 | 38.33 | 2.63  | -3.53 |
| Metformin   |  | 4091  | 129.17 | 91.49 | -0.44 | -0.23 |



|                            |                                                                                                                                                                        |         |        |        |      |       |
|----------------------------|------------------------------------------------------------------------------------------------------------------------------------------------------------------------|---------|--------|--------|------|-------|
| Manidipine dihydrochloride | 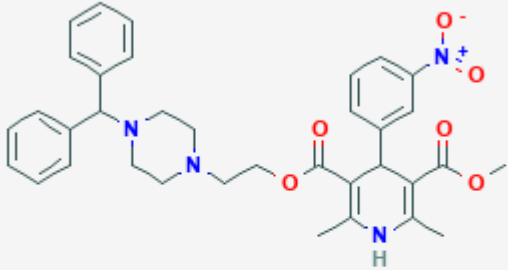 <p data-bbox="867 613 926 639">Cl - H</p> <p data-bbox="867 703 926 729">Cl - H</p> | 150762  | 610.71 | 116.93 | 5.71 | -7.47 |
| Digoxin                    |                                                                                     | 2724385 | 780.95 | 203.06 | 3.32 | -5.67 |

|            |                                                                                                                                                                                                                                                                                                                                                                                                                                                                                                                         |      |        |        |      |       |
|------------|-------------------------------------------------------------------------------------------------------------------------------------------------------------------------------------------------------------------------------------------------------------------------------------------------------------------------------------------------------------------------------------------------------------------------------------------------------------------------------------------------------------------------|------|--------|--------|------|-------|
| Isradipine | 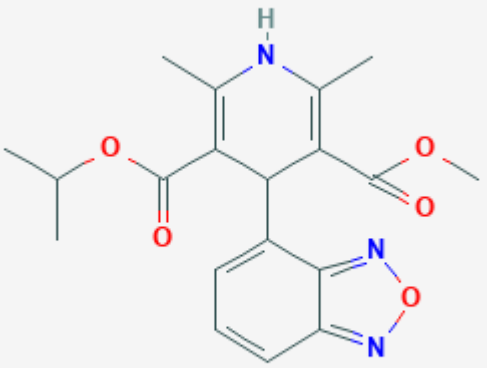 <p>The chemical structure of Isradipine is a dihydropyridine derivative. It features a central dihydropyridine ring with a hydrogen atom on the nitrogen atom. The ring is substituted with two methyl groups at the 2 and 6 positions. At the 4 position, there is a 1,2,4-benzoxazin-3-yl group. At the 3 position, there is a propyl ester group (-COOCH2CH2CH3). At the 5 position, there is a methyl ester group (-COOCH3).</p> | 3784 | 371.39 | 103.55 | 2.91 | -4.31 |
| Ibuprofen  |  <p>The chemical structure of Ibuprofen is a propionic acid derivative. It consists of a central benzene ring. At the 1 position, there is a propionic acid group (-CH2-CH2-COOH). At the 4 position, there is an isobutyl group (-CH2-CH2-CH(CH3)2).</p>                                                                                                                                                                            | 3672 | 206.29 | 37.30  | 3.61 | -3.64 |

|                          |                                                                                                                                                                                                                                                                                                                                                                                                                                                                                                                    |      |        |       |      |       |
|--------------------------|--------------------------------------------------------------------------------------------------------------------------------------------------------------------------------------------------------------------------------------------------------------------------------------------------------------------------------------------------------------------------------------------------------------------------------------------------------------------------------------------------------------------|------|--------|-------|------|-------|
| Imatinib                 | 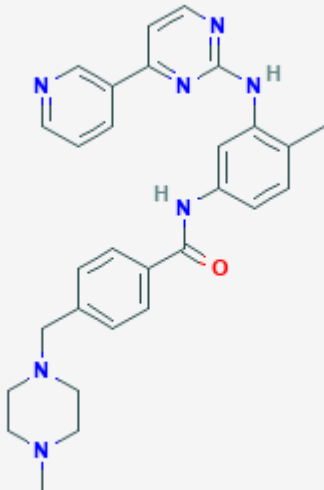 <p>The image shows the chemical structure of Imatinib, a tyrosine kinase inhibitor. It features a central imidazole ring substituted with a 4-pyridyl group, a 4-methylphenyl group, and a 4-(4-methylpiperidin-1-ylmethyl)benzamide group.</p>                                                                                                                                                                                 | 5291 | 493.62 | 86.28 | 2.83 | -5.70 |
| Quinacrine Hydrochloride | <p>Cl - H</p>  <p>The image shows the chemical structure of Quinacrine Hydrochloride. It consists of a quinacrine core (a tricyclic system of two benzene rings fused to a central pyrimidine ring) substituted with a chlorine atom at the 8-position, a methyl group at the 6-position, and a diethylaminoethyl side chain at the 4-position. The structure is shown as a hydrochloride salt, with a separate Cl-H label.</p> | 6239 | 399.97 | 37.39 | 5.71 | -5.68 |

|                             |                                                                                      |         |        |        |      |       |
|-----------------------------|--------------------------------------------------------------------------------------|---------|--------|--------|------|-------|
| Pyronaridine tetraphosphate | 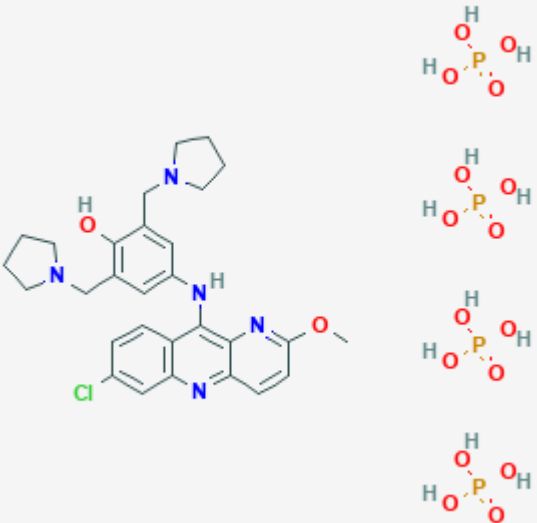   | 156867  | 518.06 | 73.75  | 6.01 | -5.73 |
| Dantrolene                  |  | 6914273 | 314.26 | 120.73 | 1.86 | -4.98 |

|                        |                                                                                     |      |        |       |      |       |
|------------------------|-------------------------------------------------------------------------------------|------|--------|-------|------|-------|
| Disulfiram with copper | 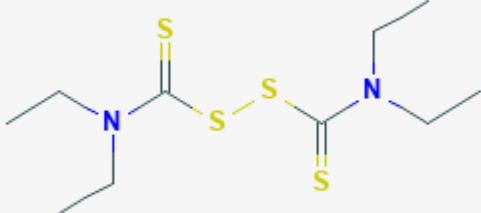  | 3117 | 296.55 | 70.66 | 3.32 | -6.18 |
| Carvedilol             |  | 2585 | 406.48 | 75.74 | 3.97 | -5.03 |

|                 |                                                                                                                                                                                                                                                                                                                                                                                                                                                                                                                                          |         |        |        |      |       |
|-----------------|------------------------------------------------------------------------------------------------------------------------------------------------------------------------------------------------------------------------------------------------------------------------------------------------------------------------------------------------------------------------------------------------------------------------------------------------------------------------------------------------------------------------------------------|---------|--------|--------|------|-------|
| Dexmedetomidine | 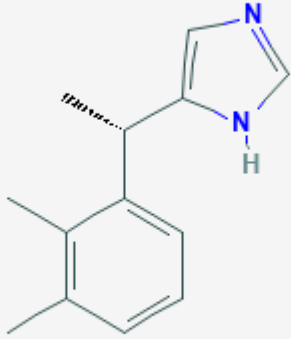 <p>The chemical structure of Dexmedetomidine consists of a benzene ring with methyl groups at the 2 and 6 positions. A chiral center is attached to the benzene ring at the 4-position, with a wedged bond to the ring and a dashed bond to a hydrogen atom. This chiral center is also bonded to a hydrogen atom and a 2,5-dihydroimidazole ring.</p>                                                                                                | 5311068 | 200.29 | 28.68  | 2.61 | -3.09 |
| Prazosin        |  <p>The chemical structure of Prazosin features a central imidazole ring. At the 2-position of the imidazole, there is a piperazine ring. At the 4-position of the imidazole, there is a benzene ring with methoxy groups at the 3 and 5 positions. At the 5-position of the imidazole, there is a hydrogen atom. The nitrogen at the 1-position of the piperazine ring is bonded to a carbonyl group, which is further attached to a furan ring.</p> | 4893    | 383.41 | 106.95 | 0.19 | -4.53 |

|                   |                                                                                                                                                                                                                                                                                                                                                                                                                   |         |        |        |       |       |
|-------------------|-------------------------------------------------------------------------------------------------------------------------------------------------------------------------------------------------------------------------------------------------------------------------------------------------------------------------------------------------------------------------------------------------------------------|---------|--------|--------|-------|-------|
| Famotidine        | 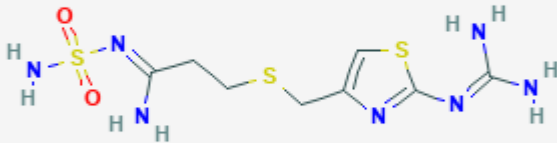 <p>The chemical structure of Famotidine is shown. It consists of a central 1,2,4-thiazole ring. One nitrogen atom of this ring is substituted with a 2-thioethylamino group (-NH-CH2-CH2-S-). The other nitrogen atom of the thiazole ring is substituted with a 2-mercaptoethylsulfonamide group (-CH2-CH2-S-NH-SO2-NH2).</p> | 5702160 | 337.45 | 175.83 | -0.85 | -2.89 |
| Alpha-lipoic acid |  <p>The chemical structure of Alpha-lipoic acid is shown. It features a central 1,2-dithiolane ring (a five-membered ring with two sulfur atoms). A propyl chain is attached to one of the carbon atoms of this ring, ending in a carboxylic acid group (-COOH).</p>                                                          | 864     | 206.33 | 37.30  | 2.93  | -2.52 |

|             |                                                                                                                                                                                                                                                                                                                                                                                                                                                                                                                                |        |        |       |      |       |
|-------------|--------------------------------------------------------------------------------------------------------------------------------------------------------------------------------------------------------------------------------------------------------------------------------------------------------------------------------------------------------------------------------------------------------------------------------------------------------------------------------------------------------------------------------|--------|--------|-------|------|-------|
| Simvastatin | 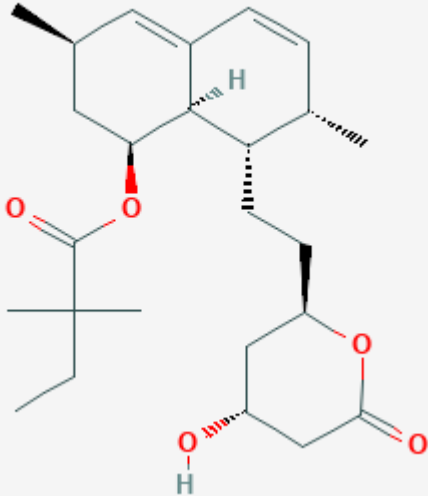 <p>The image shows the chemical structure of Simvastatin. It consists of a bicyclic core (a decalin system) with a methyl group on the left ring and a hydrogen atom on the right ring. Attached to the left ring is a side chain containing a hydroxyl group and a carbonyl group. The right ring is connected via a propyl chain to another bicyclic system, which is further substituted with a hydroxyl group and a carbonyl group.</p> | 54454  | 418.57 | 72.83 | 4.42 | -4.43 |
| Pramipexole |  <p>The image shows the chemical structure of Pramipexole. It features a central benzene ring fused to a five-membered ring containing a sulfur atom and a nitrogen atom. A propylamino group is attached to the benzene ring, and a primary amine group is attached to the five-membered ring.</p>                                                                                                                                         | 119570 | 211.33 | 50.94 | 1.35 | -1.60 |



|                 |                                                                                     |       |        |        |       |       |
|-----------------|-------------------------------------------------------------------------------------|-------|--------|--------|-------|-------|
| Atomoxetine     | 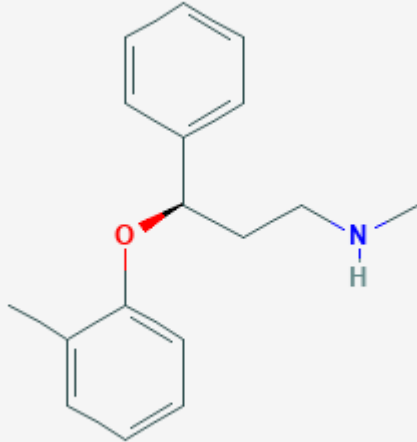  | 54841 | 255.36 | 21.26  | 4.12  | -3.33 |
| Zoledronic Acid |  | 68740 | 272.09 | 153.11 | -3.65 | 1.55  |

|            |                                                                                     |         |        |       |      |       |
|------------|-------------------------------------------------------------------------------------|---------|--------|-------|------|-------|
| Nicorandil | 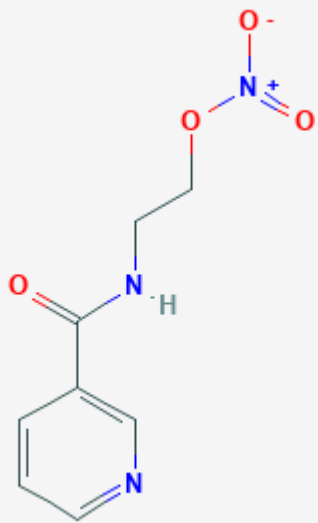  | 47528   | 211.18 | 97.04 | 0.01 | -1.17 |
| CEP-1347   |  | 9917013 | 615.78 | 94.72 | 8.40 | -9.41 |

|              |                                                                                                                                                                                                                                                                                                                                                                                                                                                                                                                                                                                 |          |        |        |      |       |
|--------------|---------------------------------------------------------------------------------------------------------------------------------------------------------------------------------------------------------------------------------------------------------------------------------------------------------------------------------------------------------------------------------------------------------------------------------------------------------------------------------------------------------------------------------------------------------------------------------|----------|--------|--------|------|-------|
| Enzalutamide | 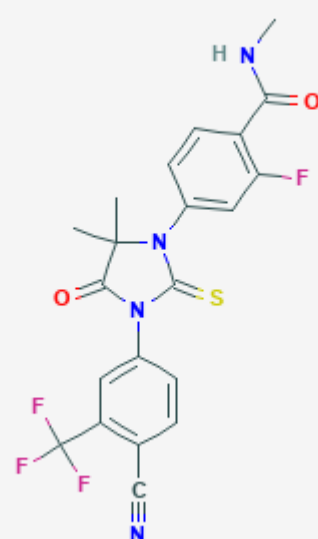 <p>The chemical structure of Enzalutamide is a complex molecule. It features a central imidazole ring system. One nitrogen of the imidazole is substituted with a tert-butyl group and a 2-fluorophenyl group. The other nitrogen is substituted with a 4-(trifluoromethyl)phenyl group and a cyano group. The 2-fluorophenyl group is further substituted with an acetamide group (-NHCH3).</p>                                                                                             | 15951529 | 464.44 | 108.53 | 3.78 | -7.55 |
| Omeprazole   |  <p>The chemical structure of Omeprazole is a benzimidazole derivative. It consists of a benzimidazole ring system where the 5-position is substituted with a methoxy group (-OCH3). The 2-position of the benzimidazole is substituted with a methylene group (-CH2-), which is further substituted with a sulfonyl group (-SO2-). The sulfonyl group is connected to a pyridine ring, which has a methoxy group (-OCH3) at the 3-position and a methyl group (-CH3) at the 4-position.</p> | 4594     | 345.42 | 96.31  | 1.32 | -3.78 |

|              |                                                                                                                                                                                                                                                                                                                                                                                                                 |         |        |       |      |       |
|--------------|-----------------------------------------------------------------------------------------------------------------------------------------------------------------------------------------------------------------------------------------------------------------------------------------------------------------------------------------------------------------------------------------------------------------|---------|--------|-------|------|-------|
| Penfluridol  | 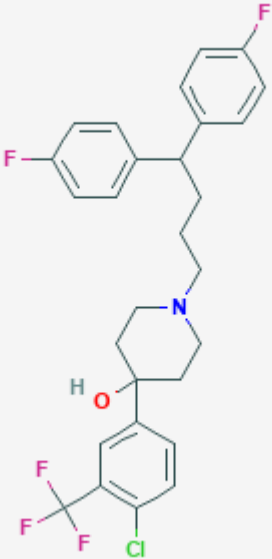 <p>The chemical structure of Penfluridol consists of a central piperidine ring. Attached to the piperidine ring are a hydroxyl group (-OH) and a 2-chloro-4-(trifluoromethyl)phenyl group. A propyl chain extends from the nitrogen atom of the piperidine ring, terminating in a 1,1'-bis(4-fluorophenyl)ethane moiety.</p> | 33630   | 523.97 | 23.47 | 8.25 | -8.18 |
| Isotretinoin |  <p>The chemical structure of Isotretinoin features a cyclohexene ring with two methyl groups at the 1 and 4 positions. A side chain is attached to the ring, consisting of three conjugated double bonds and a terminal carboxylic acid group (-COOH).</p>                                                                  | 5282379 | 300.44 | 37.30 | 4.63 | -7.60 |

|             |                                                                                                                                                                                                                                                                                                                                                                                                                                                                                                                                                       |          |        |        |       |       |
|-------------|-------------------------------------------------------------------------------------------------------------------------------------------------------------------------------------------------------------------------------------------------------------------------------------------------------------------------------------------------------------------------------------------------------------------------------------------------------------------------------------------------------------------------------------------------------|----------|--------|--------|-------|-------|
| Doxycycline | 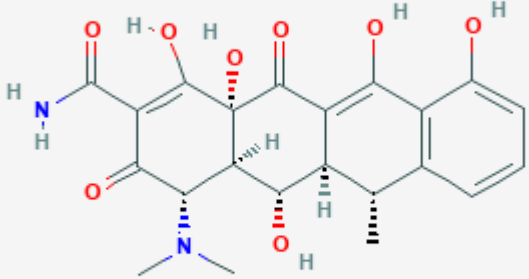 <p>The image shows the chemical structure of Doxycycline, a tetracycline antibiotic. It features a central tetracycline core with a dimethylamino group at the 7-position and a hydroxyl group at the 4-position. The structure is shown with stereochemistry: the dimethylamino group is dashed, the hydroxyl group is wedged, and the hydroxyl group at the 12-position is dashed.</p>                                                                           | 54671203 | 444.44 | 181.62 | -0.83 | -2.64 |
| Auranofin   |  <p>The image shows the chemical structure of Auranofin, a gold(I) complex. It consists of a central gold atom (Au<sup>+</sup>) coordinated to a sulfur atom (S<sup>-</sup>) and three acetate groups. The sulfur atom is part of a cyclic structure that includes a phosphorus atom (P) coordinated to three ethyl groups. The structure is shown with stereochemistry: the gold atom is yellow, the sulfur atom is green, and the phosphorus atom is orange.</p> | 24199313 | 363.36 | 114.43 | 0.07  | -2.55 |

|             |                                                                                                                                                                                                                                                                                                                                                                                                                                                                                                                                                                                                                                                                                                                                                   |           |        |        |      |       |
|-------------|---------------------------------------------------------------------------------------------------------------------------------------------------------------------------------------------------------------------------------------------------------------------------------------------------------------------------------------------------------------------------------------------------------------------------------------------------------------------------------------------------------------------------------------------------------------------------------------------------------------------------------------------------------------------------------------------------------------------------------------------------|-----------|--------|--------|------|-------|
| Eltrombopag | 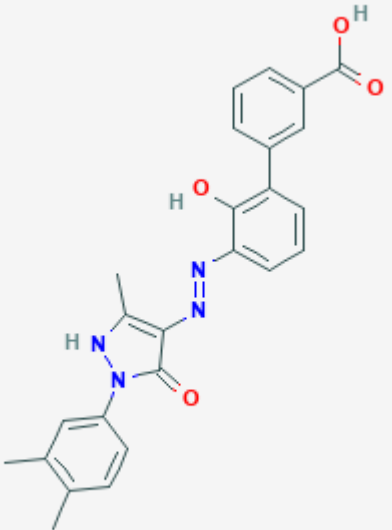 <p>The chemical structure of Eltrombopag is a complex molecule. It features a central 5-membered imidazole ring. One nitrogen atom of the imidazole ring is substituted with a 3,4-dimethylphenyl group. The other nitrogen atom is part of a carbonyl group (C=O) and is also bonded to a hydrogen atom. The 2-position of the imidazole ring is connected via a diazo group (-N=N-) to a 3-hydroxyphenyl ring. The 4-position of the imidazole ring is connected to a 4-(4-formylphenyl)phenyl group, which consists of a central phenyl ring attached to another phenyl ring that has a formyl group (-CHO) at the para position.</p>                       | 135449332 | 442.48 | 114.59 | 5.78 | -6.82 |
| Masitinib   |  <p>The chemical structure of Masitinib is a complex molecule. It features a central 5-membered thiazole ring. One nitrogen atom of the thiazole ring is substituted with a pyridine ring. The other nitrogen atom is part of an NH group and is also bonded to a hydrogen atom. The 2-position of the thiazole ring is connected to a 3-methylphenyl ring. The 4-position of the thiazole ring is connected to a 4-(4-(1-methylpiperazine)methyl)phenyl)phenyl group, which consists of a central phenyl ring attached to another phenyl ring that has a methyl group at the meta position and a 4-(1-methylpiperazine)methyl group at the para position.</p> | 10074640  | 498.65 | 73.39  | 3.82 | -5.66 |

|             |                                                                                                                                                                                                                                                                                                                                                                                                                                                                                          |           |        |        |      |       |
|-------------|------------------------------------------------------------------------------------------------------------------------------------------------------------------------------------------------------------------------------------------------------------------------------------------------------------------------------------------------------------------------------------------------------------------------------------------------------------------------------------------|-----------|--------|--------|------|-------|
| Remdesivir  | 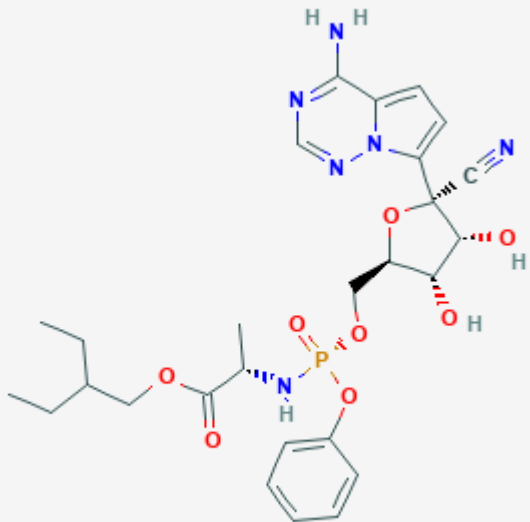 <p>The image shows the chemical structure of Remdesivir. It features a central ribose sugar ring with a cyano group (-C≡N) at the C2 position and a phosphate group at the C3 position. The phosphate group is linked to a nitrogen atom, which is further connected to a benzyl group and a propanoic acid derivative. The propanoic acid derivative is linked to a 2-aminopyrimidin-5-yl group.</p> | 121304016 | 602.58 | 203.01 | 1.75 | -5.17 |
| Chloroquine |  <p>The image shows the chemical structure of Chloroquine. It consists of a 4-chloroquinoline ring system. At the 7-position of the quinoline ring, there is a secondary amine group (-NH-) attached to a 4-diethylaminobutyl chain.</p>                                                                                                                                                              | 2719      | 319.88 | 28.16  | 4.28 | -3.78 |

|                    |                                                                                     |         |        |       |      |       |
|--------------------|-------------------------------------------------------------------------------------|---------|--------|-------|------|-------|
| Hydroxychloroquine | 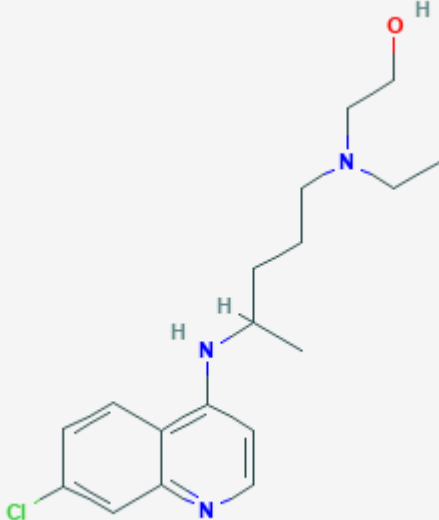  | 3652    | 335.88 | 48.39 | 3.25 | -3.26 |
| Fluvoxamine        |  | 5324346 | 318.34 | 56.84 | 3.23 | -3.09 |
